# Supplementary material for: Evolution of Symbiotic Bacteria in the Distal Human Intestine
Source: PLOS journal article supplement (doi:10.1371/journal.pbio.0050156), 2007-06-11
Supplement: S1 (10.1371/journal.pbio.0050156.s001) [file journal.pbio.0050156.s001]

**Table S1. Comparison of genome parameters for *B. distasonis* ATCC 8503, *B. vulgatus* ATCC 8482, *B. thetaiotaomicron* ATCC 29148, *B. fragilis* NCTC 9343 and *B. fragilis* YCH 46.**

| Feature                           | <i>B. distasonis</i><br>ATCC 8503 | <i>B. vulgatus</i> ATCC<br>8482 | <i>B. thetaiotaomicron</i><br>ATCC 29148 | <i>B. fragilis</i> NCTC<br>9343 | <i>B. fragilis</i> YCH<br>46 |
|-----------------------------------|-----------------------------------|---------------------------------|------------------------------------------|---------------------------------|------------------------------|
| Genome size (bp)                  | <b>4,811,379</b>                  | <b>5,163,189</b>                | 6,260,361                                | 5,205,140                       | 5,277,274                    |
| G + C (%)                         | <b>45.1</b>                       | <b>42.2</b>                     | 42.8                                     | 43.2                            | 43.3                         |
| Protein coding (%)                | <b>90.3</b>                       | <b>89.1</b>                     | 89.5                                     | 89.3                            | 90.1                         |
| Gene density (no. of CDS per Kb)  | <b>0.804</b>                      | <b>0.792</b>                    | 0.763                                    | 0.818                           | 0.867                        |
| Average CDS length (bp)           | <b>1,123</b>                      | <b>1,126</b>                    | 1,173                                    | 1,091                           | 1,039                        |
| Protein-coding genes (no.)        | <b>3,867</b>                      | <b>4,088</b>                    | 4,778                                    | 4,189                           | 4,578                        |
| CDS with functional assignment    | <b>2,427</b>                      | <b>2,505</b>                    | 2,709                                    | 2,753                           | 2,959                        |
| CDS without functional assignment | <b>1,440</b>                      | <b>1,583</b>                    | 2,069                                    | 1,436                           | 1,619                        |
| conserved hypothetical protein    | <b>1,005</b>                      | <b>1,123</b>                    | 1,532                                    | 858                             | 950                          |
| hypothetical protein              | <b>435</b>                        | <b>460</b>                      | 537                                      | 578                             | 669                          |
| Ribosomal RNA loci                | <b>7</b>                          | <b>7</b>                        | 5                                        | 6                               | 6                            |
| Transfer RNAs                     | <b>83</b>                         | <b>85</b>                       | 71                                       | 73                              | 74                           |
| Conjugative transposons           | <b>1</b>                          | <b>4</b>                        | 4                                        | 2                               | 2                            |
| Transposases                      | <b>61</b>                         | <b>121</b>                      | 109                                      | 47                              | 60                           |
| Phages                            | <b>5</b>                          | <b>3</b>                        | 5                                        | 2                               | 4                            |
| Glycoside hydrolases (GH)         | <b>97</b>                         | <b>159</b>                      | 226                                      | 126                             | 132                          |
| Polysaccharide lyases (PL)        | <b>0</b>                          | <b>7</b>                        | 15                                       | 1                               | 1                            |
| Glycosyltransferases (GT)         | <b>78</b>                         | <b>76</b>                       | 85                                       | 79                              | 81                           |
| SusC homologs*                    | <b>63 (60)</b>                    | <b>89 (86)</b>                  | 107 (107)                                | 88 (88)                         | 77 (77)                      |
| SusD homologs*                    | <b>48 (54)</b>                    | <b>74 (80)</b>                  | 57 (102)                                 | 48 (71)                         | 47 (65)                      |
| ECF- $\sigma$ factors             | <b>36</b>                         | <b>41</b>                       | 50                                       | 42                              | 41                           |
| Anti- $\sigma$ factors            | <b>23</b>                         | <b>21</b>                       | 25                                       | 25                              | 25                           |
| Hybrid two-component systems      | <b>7</b>                          | <b>22</b>                       | 32                                       | 14                              | 12                           |

**Legend:** ‘\*’, the numbers of SusC/SusD homologs provided are based on BLASTP e-value  $\leq 10^{-20}$ ; the numbers shown in parentheses are based on criteria described in SusC/SusD alignments in **Materials and Methods**. See <http://gordonlab.wustl.edu/BvBd.html> for complete lists of SusC/SusD homologs. A hybrid two-component system protein contains all of the domains present in classical two-component systems but in one polypeptide (Xu, *et al*, Science 299:2074-6, 2003).
