# Supplementary material for: Evolution of Symbiotic Bacteria in the Distal Human Intestine
Source: PLOS journal article supplement (doi:10.1371/journal.pbio.0050156), 2007-06-11
Supplement: S1 (10.1371/journal.pbio.0050156.s001) [file journal.pbio.0050156.s001]

FIGURE S1A

*Bacteroides distasonis*

ATCC 8503

4, 811, 379 bp

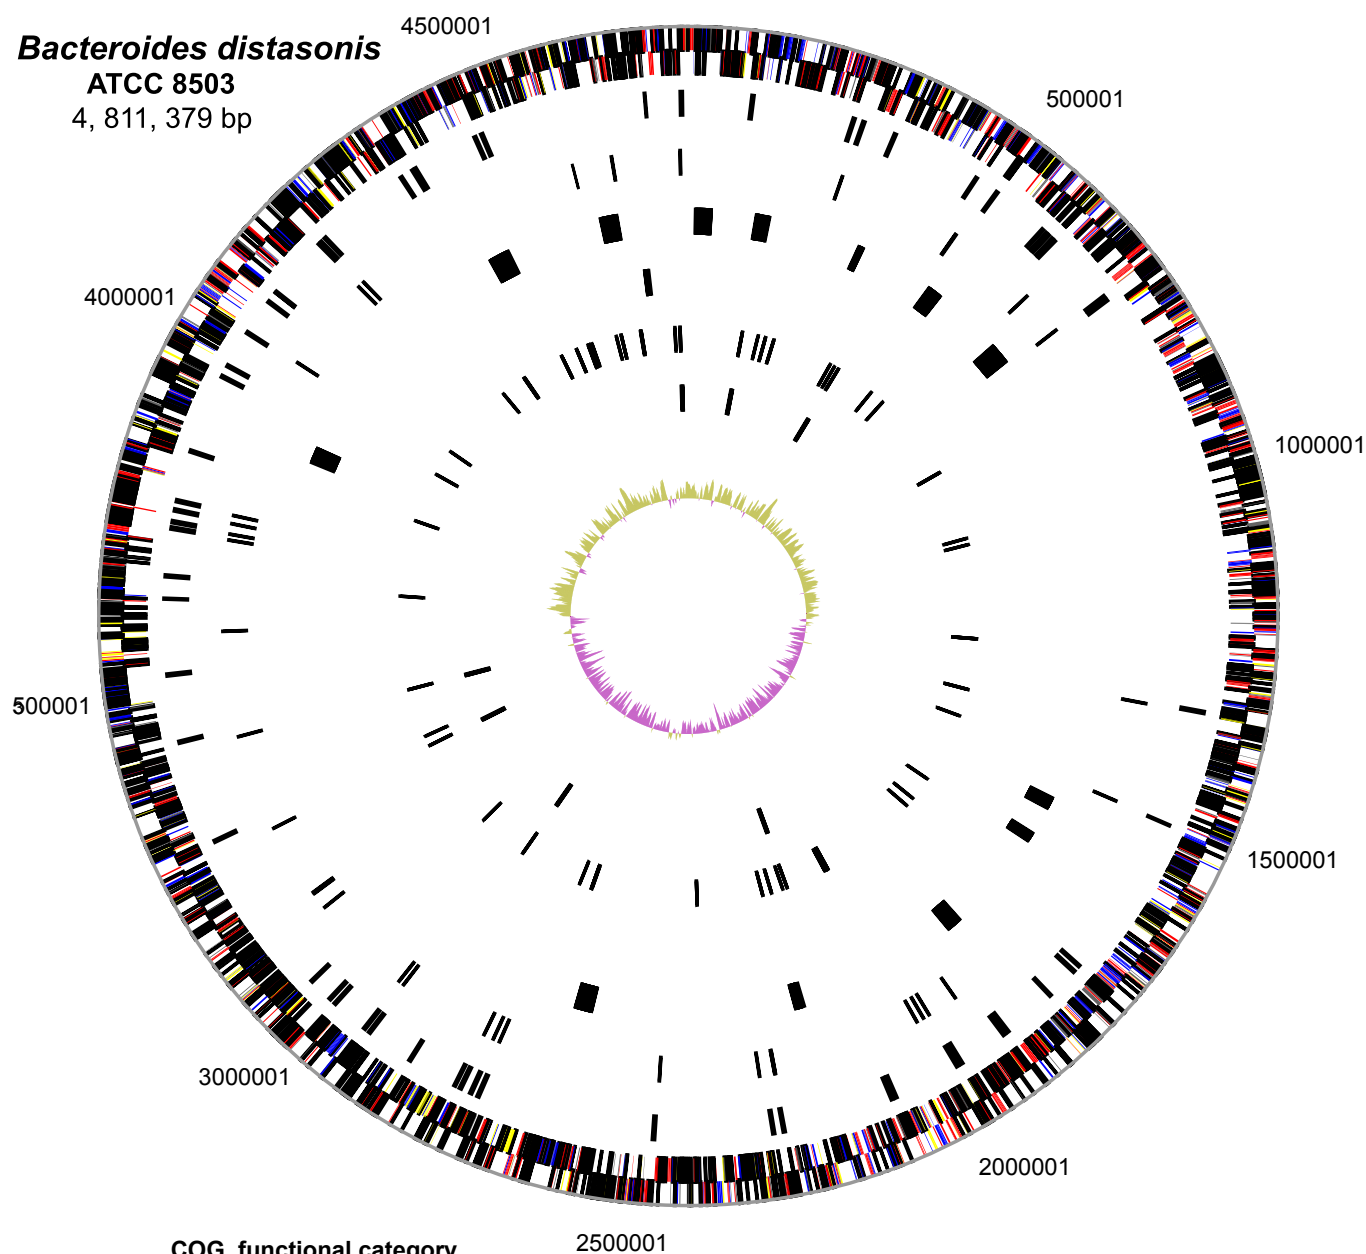

COG functional category

- |   |                                        |   |                                                               |
|---|----------------------------------------|---|---------------------------------------------------------------|
| M | Cell wall/membrane/envelope biogenesis | I | Lipid transport and metabolism                                |
| G | Carbohydrate transport and metabolism  | J | Translation, ribosomal structure and biogenesis               |
| L | Defense mechanisms                     | K | Transcription                                                 |
| V | Replication, recombination and repair  | O | Posttranslational modification, protein turnover, chaperones  |
| C | Energy production and conversion       | P | Inorganic ion transport and metabolism                        |
| D | Cell division, chromosome partitioning | Q | Secondary metabolites biosynthesis, transport and catabolism  |
| E | Amino acid transport and metabolism    | T | Signal transduction mechanisms                                |
| F | Nucleotide transport and metabolism    | U | Intracellular trafficking, secretion, and vesicular transport |
| H | Coenzyme transport and metabolism      |   |                                                               |

**FIGURE S1B**

***Bacteroides vulgatus***

**ATCC 8482**

5,163,189 bp

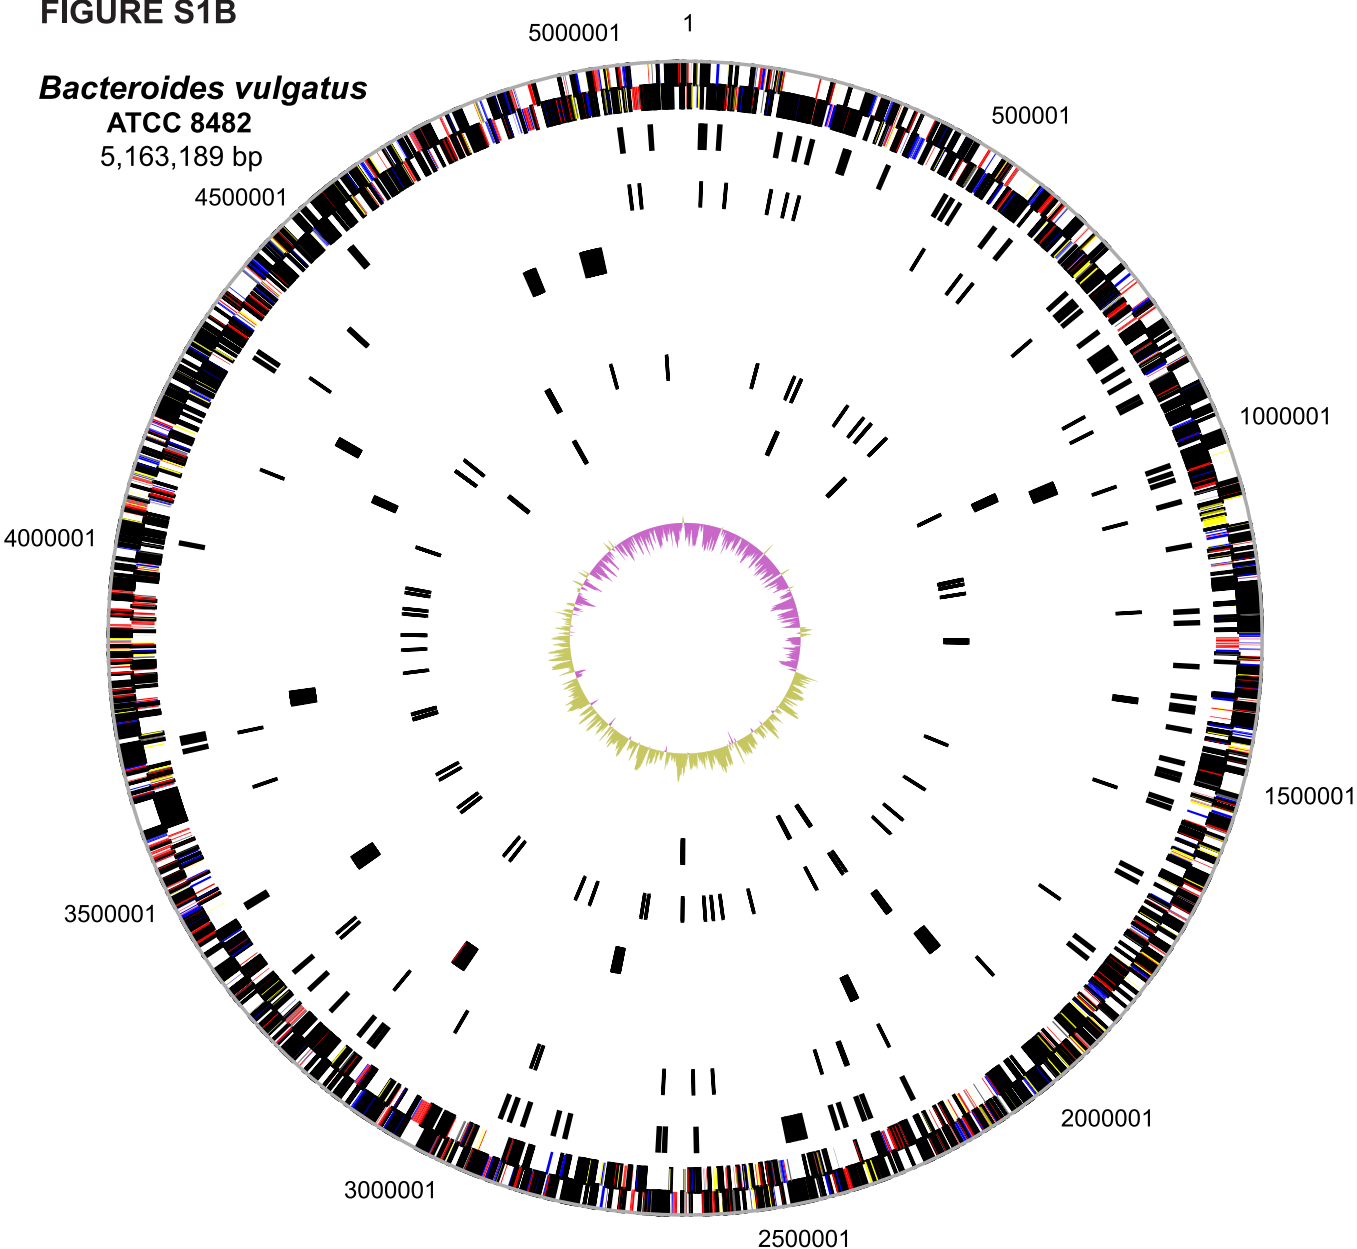

**COG functional category**

- M Cell wall/membrane/envelope biogenesis
- G Carbohydrate transport and metabolism
- L Defense mechanisms
- V Replication, recombination and repair
- C Energy production and conversion
- D Cell division, chromosome partitioning
- E Amino acid transport and metabolism
- F Nucleotide transport and metabolism
- H Coenzyme transport and metabolism

- I Lipid transport and metabolism
- J Translation, ribosomal structure and biogenesis
- K Transcription
- O Posttranslational modification, protein turnover, chaperones
- P Inorganic ion transport and metabolism
- Q Secondary metabolites biosynthesis, transport and catabolism
- T Signal transduction mechanisms
- U Intracellular trafficking, secretion, and vesicular transport
