# Supplementary material for: Evolution of Symbiotic Bacteria in the Distal Human Intestine
Source: PLOS journal article supplement (doi:10.1371/journal.pbio.0050156), 2007-06-11
Supplement: S6 (10.1371/journal.pbio.0050156.s006) [file journal.pbio.0050156.s006]

**Table S6. *CPS* loci are among the most polymorphic regions in the two *B. fragilis* genomes.**

|                                                           | <i>B. fragilis</i> NCTC 9343 | <i>B. fragilis</i> YCH 46 |
|-----------------------------------------------------------|------------------------------|---------------------------|
| <b>Number of genes in genome</b>                          | 4189                         | 4578                      |
| <b>Number of genes in <i>CPS</i> loci</b>                 | 170                          | 204                       |
| <b>Number of gene loss/gain events</b>                    | 658                          | 1047                      |
| <b>Number of gene loss/gain events in <i>CPS</i> loci</b> | 77                           | 109                       |
| <b>Probability</b>                                        | 8.8E-20                      | 3.3E-21                   |

**Legend:** The probability value is based on the tail probability of a binomial distribution. Gene loss/gain events are counted as the difference between the total number of genes in a given strain and the total number of genes shared between the two strains (3,531 in total).
