# Supplementary material for: Evolution of Symbiotic Bacteria in the Distal Human Intestine
Source: PLOS journal article supplement (doi:10.1371/journal.pbio.0050156), 2007-06-11
Supplement: S7 (10.1371/journal.pbio.0050156.s007) [file journal.pbio.0050156.s007]

**Table S7. ECF- $\sigma$  factor-containing polysaccharide utilization gene clusters in *B. distasonis* ATCC 8503 (A) and *B. vulgatus* ATCC 8482 (B).**

**(A). ECF- $\sigma$  factor-containing polysaccharide utilization gene clusters in *B. distasonis* ATCC 8503**

| <b>Cluster 1</b> |                                                                        |                |
|------------------|------------------------------------------------------------------------|----------------|
| Bd0229           | putative RNA polymerase ECF-type sigma factor                          | UNRESOLVED     |
| Bd0230           | putative anti-sigma factor                                             | UNRESOLVED     |
| Bd0231           | putative outer membrane protein, probably involved in nutrient binding | NO             |
| Bd0232           | putative outer membrane protein probably involved in nutrient binding  | UNRESOLVED     |
| Bd0233           | conserved hypothetical protein                                         | NO             |
| Bd0234           | glycoside hydrolase family 38, distantly related to alpha-mannosidases | NO             |
| Bd0235           | putative sodium-dependent transporter                                  | NO             |
| Bd0236           | helicase domain protein                                                | LGT-in         |
| Bd0237           | conserved hypothetical protein                                         | LGT-in         |
| Bd0238           | conserved hypothetical protein                                         | LGT-in         |
| Bd0239           | putative exonuclease                                                   | NOVEL          |
| Bd0240           | conserved hypothetical protein                                         | NO             |
| Bd0241           | putative acetyltransferase                                             | NOVEL          |
| <b>Cluster 2</b> |                                                                        |                |
| Bd1126c          | two-component system sensor histidine kinase                           | NO             |
| Bd1127c          | conserved hypothetical protein                                         | UNRESOLVED     |
| Bd1128c          | probable NADH-dependent dehydrogenase                                  | NO             |
| Bd1129c          | oxidoreductase, Gfo/Idh/MocA family                                    | NO             |
| Bd1130c          | putative arylsulfatase                                                 | NO             |
| Bd1131c          | putative outer membrane protein, probably involved in nutrient binding | NO             |
| Bd1132c          | putative outer membrane protein, probably involved in nutrient binding | NO             |
| Bd1133c          | putative anti-sigma factor                                             | NO             |
| Bd1134c          | putative RNA polymerase ECF-type sigma factor                          | NO             |
| <b>Cluster 3</b> |                                                                        |                |
| Bd1642c          | mucin-desulfating sulfatase                                            | NO             |
| Bd1643c          | arylsulfatase A                                                        | LGT-unresolved |
| Bd1644c          | putative outer membrane protein, probably involved in nutrient binding | NO             |
| Bd1645c          | putative outer membrane protein, probably involved in nutrient binding | NO             |
| Bd1646c          | putative anti-sigma factor                                             | NO             |
| Bd1647           | conserved hypothetical protein                                         | NO             |
| Bd1648c          | RNA polymerase ECF-type sigma factor                                   | NO             |
| <b>Cluster 4</b> |                                                                        |                |
| Bd2026           | RNA polymerase ECF-type sigma factor                                   | NO             |
| Bd2027           | putative anti-sigma factor                                             | NO             |
| Bd2028           | putative outer membrane protein probably involved in nutrient binding  | NO             |
| Bd2029           | putative outer membrane protein probably involved in nutrient binding  | NO             |
| Bd2030           | putative sulfatase                                                     | NO             |
| Bd2031           | arylsulfatase A                                                        | UNRESOLVED     |
| Bd2032           | putative aminotransferase                                              | NO             |
| Bd2033           | peptidyl-prolyl cis-trans isomerase SlyD, FKBP-type                    | NO             |
| Bd2034           | chorismate synthase                                                    | NO             |
| Bd2035           | putative multidrug resistance protein                                  | LGT-in         |
| <b>Cluster 5</b> |                                                                        |                |
| Bd2259c          | conserved hypothetical protein                                         | NO             |
| Bd2260c          | arylsulfatase A                                                        | LGT-in         |
| Bd2261c          | putative outer membrane protein probably involved in nutrient binding  | NO             |
| Bd2262c          | putative outer membrane protein probably involved in nutrient binding  | NO             |

|                   |                                                                                        |                |
|-------------------|----------------------------------------------------------------------------------------|----------------|
| Bd2263c           | putative anti-sigma factor                                                             | NO             |
| Bd2264c           | RNA polymerase ECF-type sigma factor                                                   | NO             |
| <b>Cluster 6</b>  |                                                                                        |                |
| Bd2265c           | putative secreted sulfatase precursor                                                  | UNRESOLVED     |
| Bd2266c           | arylsulfatase A                                                                        | UNRESOLVED     |
| Bd2267c           | arylsulfatase A                                                                        | LGT-unresolved |
| Bd2268c           | conserved hypothetical protein, probably involved in nutrient binding                  | NO             |
| Bd2269c           | putative outer membrane protein, probably involved in nutrient binding                 | NO             |
| Bd2270c           | putative anti-sigma factor                                                             | NO             |
| Bd2271c           | RNA polymerase ECF-type sigma factor                                                   | NO             |
| <b>Cluster 7</b>  |                                                                                        |                |
| Bd2277c           | putative 1-acyl-sn-glycerol-3-phosphate acyltransferase                                | NO             |
| Bd2278c           | glycoside hydrolase family 92, related to an ill-defined alpha-1,2-mannosidase         | UNRESOLVED     |
| Bd2279c           | putative outer membrane protein, probably involved in nutrient binding                 | NO             |
| Bd2280c           | putative outer membrane protein, probably involved in nutrient binding                 | UNRESOLVED     |
| Bd2281c           | putative anti-sigma factor                                                             | NO             |
| Bd2282            | RNA polymerase ECF-type sigma factor                                                   | UNRESOLVED     |
| <b>Cluster 8</b>  |                                                                                        |                |
| Bd2405c           | hypothetical protein                                                                   | NOVEL          |
| Bd2406c           | conserved hypothetical protein                                                         | LGT-unresolved |
| Bd2407c           | conserved hypothetical protein                                                         | UNRESOLVED     |
| Bd2408c           | glycoside hydrolase family 28, related to polygalacturonases                           | UNRESOLVED     |
| Bd2409c           | putative outer membrane protein, probably involved in nutrient binding                 | UNRESOLVED     |
| Bd2410c           | putative outer membrane protein, probably involved in nutrient binding                 | UNRESOLVED     |
| Bd2411c           | putative anti-sigma factor                                                             | UNRESOLVED     |
| Bd2412c           | RNA polymerase ECF-type sigma factor                                                   | UNRESOLVED     |
| <b>Cluster 9</b>  |                                                                                        |                |
| Bd2413c           | putative dehydrogenase                                                                 | NO             |
| Bd2414c           | putative glycosylhydrolase (putative secreted protein)                                 | UNRESOLVED     |
| Bd2415c           | putative outer membrane protein, probably involved in nutrient binding                 | NO             |
| Bd2416c           | putative outer membrane protein, probably involved in nutrient binding                 | NO             |
| Bd2417c           | putative anti-sigma factor                                                             | NO             |
| Bd2418            | RNA polymerase ECF-type sigma factor                                                   | NO             |
| <b>Cluster 10</b> |                                                                                        |                |
| Bd3036            | RNA polymerase ECF-type sigma factor                                                   | UNRESOLVED     |
| Bd3037            | putative anti-sigma factor                                                             | UNRESOLVED     |
| Bd3038            | putative outer membrane protein probably involved in nutrient binding                  | NO             |
| Bd3039            | putative outer membrane protein, probably involved in nutrient binding                 | UNRESOLVED     |
| Bd3040            | conserved hypothetical protein with endonuclease/exonuclease/phosphatase family domain | UNRESOLVED     |
| Bd3041            | conserved hypothetical protein with endonuclease/exonuclease/phosphatase family domain | NO             |
| <b>Cluster 11</b> |                                                                                        |                |
| Bd3042            | RNA polymerase ECF-type sigma factor                                                   | UNRESOLVED     |
| Bd3043            | putative anti-sigma factor                                                             | NO             |
| Bd3044            | putative outer membrane protein probably involved in nutrient binding                  | NO             |
| Bd3045            | putative outer membrane protein probably involved in nutrient binding                  | NO             |
| Bd3046            | conserved hypothetical protein                                                         | LGT-in         |
| Bd3047            | hypothetical protein                                                                   | NOVEL          |
| Bd3048            | glycoside hydrolase family 2, candidate beta-glycosidase                               | UNRESOLVED     |
| Bd3049c           | glycoside hydrolase family 2, candidate beta-glycosidase                               | NO             |
| Bd3050            | conserved hypothetical protein                                                         | NO             |
| Bd3051            | putative transmembrane protein                                                         | UNRESOLVED     |

|                   |                                                                                |                |
|-------------------|--------------------------------------------------------------------------------|----------------|
| <b>Cluster 12</b> |                                                                                |                |
| Bd3052            | RNA polymerase ECF-type sigma factor                                           | NO             |
| Bd3053            | putative anti-sigma factor                                                     | NO             |
| Bd3054            | putative outer membrane protein, probably involved in nutrient binding         | NO             |
| Bd3055            | putative outer membrane protein, probably involved in nutrient binding         | NO             |
| Bd3056            | conserved hypothetical protein                                                 | LGT-unresolved |
| Bd3057            | glycoside hydrolase family 97, related to alpha-glucosidases                   | UNRESOLVED     |
| Bd3058            | putative lysophospholipase L1 and related esterase                             | NO             |
| <b>Cluster 13</b> |                                                                                |                |
| Bd3059            | RNA polymerase ECF-type sigma factor                                           | NO             |
| Bd3060            | putative anti-sigma factor                                                     | UNRESOLVED     |
| Bd3061            | putative outer membrane protein, probably involved in nutrient binding         | UNRESOLVED     |
| Bd3062            | putative outer membrane protein, probably involved in nutrient binding         | UNRESOLVED     |
| Bd3063            | conserved hypothetical protein                                                 | UNRESOLVED     |
| Bd3064            | putative integrase/transposase                                                 | UNRESOLVED     |
| Bd3065            | conserved hypothetical protein                                                 | UNRESOLVED     |
| Bd3066            | hypothetical protein                                                           | UNRESOLVED     |
| Bd3067            | glycoside hydrolase family 78, related to alpha-L-rhamnosidases                | NO             |
| Bd3068            | glycoside hydrolase family 92, related to an ill-defined alpha-1,2-mannosidase | NO             |
| <b>Cluster 14</b> |                                                                                |                |
| Bd3260c           | putative exported protein                                                      | NO             |
| Bd3261c           | conserved hypothetical protein                                                 | UNRESOLVED     |
| Bd3262c           | conserved hypothetical protein                                                 | NO             |
| Bd3263c           | putative outer membrane protein, probably involved in nutrient binding         | NO             |
| Bd3264c           | putative outer membrane protein, probably involved in nutrient binding         | NO             |
| Bd3265c           | putative anti-sigma factor                                                     | NO             |
| Bd3266c           | putative ECF-type RNA polymerase sigma factor                                  | NO             |
| <b>Cluster 15</b> |                                                                                |                |
| Bd3386            | putative RNA polymerase ECF-type sigma factor                                  | NO             |
| Bd3387            | conserved hypothetical protein                                                 | NO             |
| Bd3388            | hypothetical protein                                                           | LGT-unresolved |
| Bd3389            | putative outer membrane protein probably involved in nutrient binding          | NO             |
| Bd3390            | putative outer membrane protein probably involved in nutrient binding          | UNRESOLVED     |
| Bd3391            | conserved hypothetical protein                                                 | LGT-in         |
| Bd3392            | hypothetical protein                                                           | NOVEL          |
| Bd3393c           | putative permease                                                              | NO             |
| <b>Cluster 16</b> |                                                                                |                |
| Bd3859            | RNA polymerase ECF-type sigma factor                                           | NO             |
| Bd3860            | putative anti-sigma factor                                                     | NO             |
| Bd3861            | putative outer membrane protein, probably involved in nutrient binding         | NO             |
| Bd3862            | putative outer membrane protein, probably involved in nutrient binding         | UNRESOLVED     |
| Bd3863            | arylsulfatase precursor                                                        | UNRESOLVED     |
| Bd3864            | N-acetylgalactosamine 6-sulfatase (GALNS)                                      | UNRESOLVED     |

**(B). ECF- $\sigma$  factor-containing polysaccharide utilization gene clusters in *B. vulgatus* ATCC 8482**

|                  |                                                                                      |                |
|------------------|--------------------------------------------------------------------------------------|----------------|
| <b>Cluster 1</b> |                                                                                      |                |
| Bv0103c          | hypothetical protein                                                                 | NOVEL          |
| Bv0104c          | conserved hypothetical protein, possible ATP/GTP-binding site                        | UNRESOLVED     |
| Bv0105c          | putative oxidoreductase                                                              | NO             |
| Bv0106c          | putative outer membrane protein, probably involved in nutrient binding               | NO             |
| Bv0107c          | putative outer membrane protein, probably involved in nutrient binding               | NO             |
| Bv0108c          | putative anti-sigma factor                                                           | NO             |
| Bv0109c          | RNA polymerase ECF-type sigma factor                                                 | NO             |
| <b>Cluster 2</b> |                                                                                      |                |
| Bv0110c          | putative thiol:disulfide interchange protein DsbE                                    | NO             |
| Bv0111c          | putative thiol:disulfide interchange protein                                         | NO             |
| Bv0112c          | conserved hypothetical protein                                                       | NO             |
| Bv0113c          | conserved hypothetical protein                                                       | NO             |
| Bv0114c          | putative regulatory protein                                                          | NO             |
| Bv0115c          | glycoside hydrolase family 88, candidate delta-4,5 unsaturated glucuronyl hydrolase  | NO             |
| Bv0116c          | glycoside hydrolase family 43, candidate beta-xylosidase/alpha-L-arabinofuranosidase | NO             |
| Bv0117c          | glycoside hydrolase family 97, related to alpha-glucosidases                         | NO             |
| Bv0118c          | conserved hypothetical protein                                                       | NO             |
| Bv0119c          | putative beta-lactamase class C and other penicillin binding proteins                | LGT-in         |
| Bv0120c          | conserved hypothetical protein                                                       | NO             |
| Bv0121c          | glycoside hydrolase family 28, distantly related to polygalacturonases               | LGT-out        |
| Bv0122c          | conserved hypothetical protein                                                       | NO             |
| Bv0123c          | conserved hypothetical protein                                                       | NO             |
| Bv0124c          | glycoside hydrolase family 28, distantly related to polygalacturonases               | NO             |
| Bv0125c          | putative outer membrane protein, probably involved in nutrient binding               | NO             |
| Bv0126c          | putative outer membrane protein, probably involved in nutrient binding               | NO             |
| Bv0127c          | RNA polymerase ECF-type sigma factor                                                 | NO             |
| <b>Cluster 3</b> |                                                                                      |                |
| Bv0132c          | glycoside hydrolase family 92, related to an ill-defined alpha-1,2-mannosidase       | UNRESOLVED     |
| Bv0133c          | glycoside hydrolase family 97, related to alpha-glucosidases                         | NO             |
| Bv0134c          | putative outer membrane protein, probably involved in nutrient binding               | UNRESOLVED     |
| Bv0135c          | putative outer membrane protein, probably involved in nutrient binding               | NO             |
| Bv0136c          | putative RNA polymerase ECF-type sigma factor                                        | UNRESOLVED     |
| <b>Cluster 3</b> |                                                                                      |                |
| Bv0293c          | glycoside hydrolase family 2, related to beta-galactosidases                         | UNRESOLVED     |
| Bv0294c          | glycoside hydrolase family 63, distantly related to alpha-glycosidases               | UNRESOLVED     |
| Bv0295c          | putative outer membrane protein, probably involved in nutrient binding               | UNRESOLVED     |
| Bv0296c          | putative outer membrane protein, probably involved in nutrient binding               | NO             |
| Bv0297c          | putative anti-sigma factor                                                           | NO             |
| Bv0298c          | putative RNA polymerase ECF-type sigma factor                                        | NO             |
| <b>Cluster 4</b> |                                                                                      |                |
| Bv0342c          | histidyl-tRNA synthetase                                                             | NO             |
| Bv0343c          | putative ABC transporter, periplasmic sugar-binding protein                          | LGT-in         |
| Bv0344c          | transposase                                                                          | UNRESOLVED     |
| Bv0345c          | ABC-type sugar transport system, periplasmic component                               | LGT-in         |
| Bv0346c          | putative integral membrane protein                                                   | NO             |
| Bv0347c          | conserved hypothetical protein                                                       | LGT-unresolved |
| Bv0348c          | glycerol kinase 2 (ATP:glycerol 3-phosphotransferase 2)                              | LGT-unresolved |
| Bv0349c          | transketolase, C-terminal subunit                                                    | LGT-unresolved |
| Bv0350c          | transketolase, N-terminal subunit                                                    | LGT-unresolved |
| Bv0351c          | transcriptional regulator of sugar metabolism                                        | LGT-in         |

|                  |                                                                                                                                                                                      |                |
|------------------|--------------------------------------------------------------------------------------------------------------------------------------------------------------------------------------|----------------|
| Bv0352c          | 3,4-dihydroxy-2-butanone 4-phosphate synthase (cyclohydrolase II)                                                                                                                    | LGT-unresolved |
| Bv0353c          | conserved hypothetical protein                                                                                                                                                       | LGT-unresolved |
| Bv0354c          | two-component system sensor histidine kinase/response regulator, hybrid ('one-component system')                                                                                     | NO             |
| Bv0355c          | putative outer membrane protein, probably involved in nutrient binding                                                                                                               | UNRESOLVED     |
| Bv0356c          | putative outer membrane protein, probably involved in nutrient binding                                                                                                               | NO             |
| Bv0357c          | conserved hypothetical protein, putative anti-sigma factor                                                                                                                           | NO             |
| Bv0358c          | RNA polymerase ECF-type sigma factor                                                                                                                                                 | NO             |
| <b>Cluster 5</b> |                                                                                                                                                                                      |                |
| Bv0377           | putative RNA polymerase ECF-type sigma factor                                                                                                                                        | NO             |
| Bv0378           | putative anti-sigma factor                                                                                                                                                           | NO             |
| Bv0379           | putative outer membrane protein, probably involved in nutrient binding                                                                                                               | NO             |
| Bv0380           | putative outer membrane protein, probably involved in nutrient binding                                                                                                               | NO             |
| Bv0381           | glycoside hydrolase family 2, candidate beta-glycosidase                                                                                                                             | UNRESOLVED     |
| Bv0382           | glycoside hydrolase family 20, distantly related to beta-N-acetylhexosaminidases                                                                                                     | LGT-unresolved |
| Bv0383           | glycoside hydrolase family 2, candidate beta-glycosidase                                                                                                                             | NO             |
| Bv0384           | arylsulfatase                                                                                                                                                                        | NO             |
| Bv0385           | hypothetical protein                                                                                                                                                                 | LGT-in         |
| Bv0386           | NADH-ubiquinone oxidoreductase subunit                                                                                                                                               | NOVEL          |
| Bv0387           | hypothetical protein                                                                                                                                                                 | NOVEL          |
| <b>Cluster 6</b> |                                                                                                                                                                                      |                |
| Bv0472c          | conserved hypothetical protein                                                                                                                                                       | UNRESOLVED     |
| Bv0473c          | glycoside hydrolase family 31, candidate alpha-glycosidase; related to beta-                                                                                                         | NO             |
| Bv0474c          | putative outer membrane protein, probably involved in nutrient binding                                                                                                               | NO             |
| Bv0475c          | putative outer membrane protein, probably involved in nutrient binding                                                                                                               | NO             |
| Bv0476c          | two-component system response regulator                                                                                                                                              | NO             |
| Bv0477c          | glycoside hydrolase family 35, candidate beta-glycosidase; related to beta-galactosidases                                                                                            | NO             |
| Bv0478c          | glycoside hydrolase family 51, related to alpha-L-arabinofuranosidases                                                                                                               | NO             |
| Bv0479c          | glycoside hydrolase family 43, modular protein with N-terminal domain distantly related to beta-glycosidases and C-terminal related to beta-xylosidases/alpha-L-arabinofuranosidases | UNRESOLVED     |
| Bv0480c          | glycoside hydrolase family 30, candidate beta-glycosidase                                                                                                                            | NO             |
| Bv0481c          | putative outer membrane protein, probably involved in nutrient binding                                                                                                               | NO             |
| Bv0482c          | putative outer membrane protein, probably involved in nutrient binding                                                                                                               | NO             |
| Bv0483c          | putative anti-sigma factor                                                                                                                                                           | NO             |
| Bv0484c          | putative RNA polymerase ECF-type sigma factor                                                                                                                                        | NO             |
| <b>Cluster 7</b> |                                                                                                                                                                                      |                |
| Bv0593c          | putative oxidoreductase                                                                                                                                                              | NO             |
| Bv0594c          | conserved hypothetical protein                                                                                                                                                       | NO             |
| Bv0595c          | putative signal transducer                                                                                                                                                           | NO             |
| Bv0596c          | conserved hypothetical protein                                                                                                                                                       | NO             |
| Bv0597c          | exo-alpha sialidase                                                                                                                                                                  | NO             |
| Bv0598c          | conserved hypothetical protein                                                                                                                                                       | NO             |
| Bv0599c          | glycoside hydrolase family 18, related to chitinases                                                                                                                                 | NO             |
| Bv0600c          | conserved hypothetical protein                                                                                                                                                       | NO             |
| Bv0601c          | putative outer membrane protein, probably involved in nutrient binding                                                                                                               | NO             |
| Bv0602c          | glycoside hydrolase family 97, related to alpha-glucosidases                                                                                                                         | NO             |
| Bv0603c          | putative endonuclease/exonuclease/phosphatase family protein                                                                                                                         | NO             |
| Bv0604c          | conserved hypothetical protein                                                                                                                                                       | NO             |
| Bv0605c          | putative outer membrane protein, probably involved in nutrient binding                                                                                                               | NO             |
| Bv0606c          | glycoside hydrolase family 92, related to an ill-defined alpha-1,2-mannosidase                                                                                                       | NO             |
| Bv0607c          | glycoside hydrolase family 92, related to an ill-defined alpha-1,2-mannosidase                                                                                                       | NO             |

|                   |                                                                                             |                |
|-------------------|---------------------------------------------------------------------------------------------|----------------|
| Bv0608c           | putative anti-sigma factor                                                                  | NO             |
| Bv0609c           | RNA polymerase ECF-type sigma factor                                                        | NO             |
| <b>Cluster 8</b>  |                                                                                             |                |
| Bv0709c           | hypothetical protein                                                                        | NOVEL          |
| Bv0710c           | conserved hypothetical protein                                                              | NO             |
| Bv0711c           | conserved hypothetical protein                                                              | LGT-in         |
| Bv0712c           | putative outer membrane protein, probably involved in nutrient binding                      | NO             |
| Bv0713c           | putative outer membrane protein, probably involved in nutrient binding                      | NO             |
| Bv0714c           | putative anti-sigma factor                                                                  | NO             |
| Bv0715c           | RNA polymerase ECF-type sigma factor                                                        | NO             |
| Bv0716c           | glycoside hydrolase family 36, candidate alpha-glycosidase; related to alpha-galactosidases | NO             |
| <b>Cluster 9</b>  |                                                                                             |                |
| Bv0915c           | RNA polymerase ECF-type sigma factor                                                        | NO             |
| Bv0916            | putative anti-sigma factor                                                                  | NO             |
| Bv0917            | putative outer membrane protein, probably involved in nutrient binding                      | NO             |
| Bv0918            | putative outer membrane protein, probably involved in nutrient binding                      | UNRESOLVED     |
| Bv0919            | conserved hypothetical protein                                                              | NO             |
| Bv0920            | conserved hypothetical protein                                                              | NO             |
| Bv0921            | putative oxidoreductase (putative secreted protein)                                         | LGT-unresolved |
| <b>Cluster 10</b> |                                                                                             |                |
| Bv1025            | RNA polymerase ECF-type sigma factor                                                        | NO             |
| Bv1026            | putative anti-sigma factor                                                                  | NOVEL          |
| Bv1027            | putative outer membrane protein, probably involved in nutrient binding                      | NO             |
| Bv1028            | hypothetical protein                                                                        | NO             |
| Bv1029c           | erythronate-4-phosphate dehydrogenase                                                       | NO             |
| Bv1030            | glycosyltransferase family 9, related to glycosyltransferases                               | NO             |
| Bv1031            | putative acetyltransferase                                                                  | NO             |
| Bv1032            | putative LPS biosynthesis related UDP-galactopyranose mutase                                | NO             |
| Bv1033            | conserved hypothetical protein                                                              | NO             |
| Bv1034            | conserved hypothetical protein                                                              | UNRESOLVED     |
| Bv1035            | glycosyltransferase family 2, related to beta-glycosyltransferases                          | NO             |
| Bv1036            | glycosyltransferase family 2, distantly related to beta-glycosyltransferases                | UNRESOLVED     |
| Bv1037            | glycosyltransferase family 14, related to beta-glycosyltransferases                         | NO             |
| Bv1038            | glycosyltransferase family 4, related to alpha-glycosyltransferases                         | NO             |
| <b>Cluster 11</b> |                                                                                             |                |
| Bv1124            | putative ECF sigma factor                                                                   | NO             |
| Bv1125            | putative membrane protein                                                                   | NO             |
| Bv1126            | putative outer membrane protein, probably involved in nutrient binding                      | NO             |
| Bv1127            | putative outer membrane protein, probably involved in nutrient binding                      | NO             |
| Bv1128            | sulfatase                                                                                   | LGT-unresolved |
| Bv1129            | arylsulfatase precursor                                                                     | NO             |
| Bv1130            | putative ATP-binding ABC transporter protein                                                | NO             |
| <b>Cluster 12</b> |                                                                                             |                |
| Bv1663c           | RNA polymerase ECF-type sigma factor                                                        | NO             |
| Bv1664            | putative anti-sigma factor                                                                  | NO             |
| Bv1665            | putative outer membrane protein, probably involved in nutrient binding                      | NO             |
| Bv1666            | putative outer membrane protein, probably involved in nutrient binding                      | UNRESOLVED     |
| Bv1667            | glycerophosphoryl diester phosphodiesterase                                                 | NO             |
| <b>Cluster 13</b> |                                                                                             |                |
| Bv1721c           | glycoside hydrolase family 28, related to polygalacturonases                                | UNRESOLVED     |
| Bv1722c           | glycoside hydrolase family 2, candidate beta-glycosidase                                    | NO             |
| Bv1723c           | glycoside hydrolase family 28, related to polygalacturonases                                | UNRESOLVED     |

|                   |                                                                                                                                                                              |                |
|-------------------|------------------------------------------------------------------------------------------------------------------------------------------------------------------------------|----------------|
| Bv1724            | hypothetical protein                                                                                                                                                         | NOVEL          |
| Bv1725c           | iduronate 2-sulfatase precursor                                                                                                                                              | NO             |
| Bv1726c           | putative outer membrane protein, probably involved in nutrient binding                                                                                                       | NO             |
| Bv1727c           | putative outer membrane protein, probably involved in nutrient binding                                                                                                       | NO             |
| Bv1728c           | putative anti-sigma factor                                                                                                                                                   | NO             |
| Bv1729            | RNA polymerase ECF-type sigma factor                                                                                                                                         | NO             |
| <b>Cluster 14</b> |                                                                                                                                                                              |                |
| Bv1733            | putative ECF-type RNA polymerase sigma factor                                                                                                                                | NO             |
| Bv1734            | putative anti-sigma factor                                                                                                                                                   | NO             |
| Bv1735            | putative outer membrane protein, probably involved in nutrient binding                                                                                                       | NO             |
| Bv1736            | putative outer membrane protein, probably involved in nutrient binding                                                                                                       | NO             |
| Bv1737            | conserved hypothetical protein                                                                                                                                               | NO             |
| Bv1738            | conserved hypothetical protein                                                                                                                                               | NO             |
| Bv1739            | glycoside hydrolase family 2, candidate beta-glycosidase                                                                                                                     | UNRESOLVED     |
| Bv1740            | hypothetical protein                                                                                                                                                         | NOVEL          |
| Bv1741            | glycoside hydrolase family 78, distantly related to alpha-L-rhamnosidases                                                                                                    | UNRESOLVED     |
| Bv1742            | two-component system response regulator                                                                                                                                      | NO             |
| Bv1743            | aldehyde dehydrogenase A                                                                                                                                                     | LGT-unresolved |
| Bv1744            | glycoside hydrolase family 43, related to beta-xylosidases/alpha-L-                                                                                                          | NO             |
| Bv1745            | conserved hypothetical protein                                                                                                                                               | NO             |
| Bv1746            | conserved hypothetical protein                                                                                                                                               | NO             |
| Bv1747            | conserved hypothetical protein                                                                                                                                               | NO             |
| <b>Cluster 15</b> |                                                                                                                                                                              |                |
| Bv1758            | putative RNA polymerase ECF-type sigma factor                                                                                                                                | NO             |
| Bv1759            | putative anti-sigma factor                                                                                                                                                   | NO             |
| Bv1760            | putative outer membrane protein, probably involved in nutrient binding                                                                                                       | NO             |
| Bv1761            | putative outer membrane protein, probably involved in nutrient binding                                                                                                       | NO             |
| Bv1762            | glycoside hydrolase family 2, candidate beta-glycosidase                                                                                                                     | LGT-out        |
| Bv1763            | glycoside hydrolase family 2, candidate beta-glycosidase                                                                                                                     | NO             |
| Bv1764            | glycoside hydrolase family 31, candidate alpha-glycosidase                                                                                                                   | UNRESOLVED     |
| Bv1765            | conserved hypothetical protein                                                                                                                                               | UNRESOLVED     |
| Bv1766c           | putative pectin degradation protein                                                                                                                                          | LGT-in         |
| Bv1767            | polysaccharide lyase family 10, related to pectate lyases                                                                                                                    | LGT-in         |
| Bv1768            | conserved hypothetical protein                                                                                                                                               | NO             |
| Bv1769            | carbohydrate esterase family 8, modular protein with N-terminal domain distantly related to pectin acetyl esterases and C-terminal domain related to pectin methyl esterases | NO             |
| Bv1770            | two-component system sensor histidine kinase/response regulator, hybrid ('one-component system')                                                                             | NO             |
| Bv1771            | hypothetical protein                                                                                                                                                         | NO             |
| Bv1772            | dipeptidyl peptidase IV                                                                                                                                                      | NO             |
| <b>Cluster 16</b> |                                                                                                                                                                              |                |
| Bv1927c           | putative thiol-disulfide oxidoreductase                                                                                                                                      | UNRESOLVED     |
| Bv1928c           | putative disulphide-isomerase                                                                                                                                                | NO             |
| Bv1929c           | putative outer membrane protein, probably involved in nutrient binding                                                                                                       | UNRESOLVED     |
| Bv1930c           | putative outer membrane protein, probably involved in nutrient binding                                                                                                       | UNRESOLVED     |
| Bv1931c           | putative anti-sigma factor                                                                                                                                                   | NO             |
| Bv1932c           | RNA polymerase ECF-type sigma factor                                                                                                                                         | UNRESOLVED     |
| Bv1933c           | glycoside hydrolase family 43, candidate beta-xylosidase/alpha-L-arabinofuranosidase                                                                                         | NO             |
| Bv1934c           | conserved hypothetical protein                                                                                                                                               | NO             |
| Bv1935c           | glycoside hydrolase family 28, related to polygalacturonases                                                                                                                 | NO             |
| <b>Cluster 17</b> |                                                                                                                                                                              |                |
| Bv1972            | RNA polymerase ECF-type sigma factor                                                                                                                                         | NO             |

|                   |                                                                        |            |
|-------------------|------------------------------------------------------------------------|------------|
| Bv1973            | putative anti-sigma factor                                             | NO         |
| Bv1974            | putative outer membrane protein, probably involved in nutrient binding | UNRESOLVED |
| Bv1975            | putative outer membrane protein, probably involved in nutrient binding | UNRESOLVED |
| Bv1976            | hypothetical protein                                                   | NOVEL      |
| Bv1977            | ABC transporter ATP-binding protein                                    | NO         |
| Bv1978            | putative endothelin-converting enzyme                                  | NO         |
| Bv1979            | conserved hypothetical protein                                         | NO         |
| Bv1980            | putative metal resistance related exported protein                     | NO         |
| Bv1981            | AcrB/AcrD/AcrF family cation efflux system protein                     | NO         |
| Bv1982            | conserved hypothetical protein                                         | NO         |
| Bv1983            | ThiJ/PfpI family protein                                               | NO         |
| Bv1984            | putative nitroreductase                                                | NO         |
| <b>Cluster 18</b> |                                                                        |            |
| Bv2160            | RNA polymerase ECF-type sigma factor                                   | UNRESOLVED |
| Bv2161            | putative anti-sigma factor                                             | NO         |
| Bv2162            | putative outer membrane protein, probably involved in nutrient binding | NO         |
| Bv2163            | putative outer membrane protein, probably involved in nutrient binding | UNRESOLVED |
| <b>Bv2164</b>     | putative thiol-disulfide oxidoreductase                                | UNRESOLVED |
| Bv2165            | putative thiol-disulfide oxidoreductase                                | UNRESOLVED |
| Bv2166            | glycoside hydrolase family 2, candidate beta-glycosidase               | NO         |
| Bv2167            | aldose 1-epimerase precursor                                           | NO         |
| <b>Cluster 19</b> |                                                                        |            |
| Bv2384c           | L-serine dehydratase                                                   | NO         |
| Bv2385c           | conserved hypothetical protein                                         | NO         |
| Bv2386c           | putative outer membrane protein, probably involved in nutrient binding | NO         |
| Bv2387c           | putative outer membrane protein, probably involved in nutrient binding | NO         |
| Bv2388c           | putative anti-sigma factor                                             | NO         |
| Bv2389c           | RNA polymerase ECF-type sigma factor                                   | UNRESOLVED |
| <b>Cluster 20</b> |                                                                        |            |
| Bv4006c           | conserved hypothetical protein                                         | NO         |
| Bv4007c           | putative outer membrane protein, probably involved in nutrient binding | NO         |
| Bv4008c           | putative outer membrane protein, probably involved in nutrient binding | NO         |
| Bv4009c           | putative anti-sigma factor                                             | NO         |
| Bv4010c           | RNA polymerase ECF-type sigma factor                                   | NO         |

**Legend:** The three columns represent Gene ID, functional annotation and predicted evolutionary history of the gene (labeled as in **Table S5**).
